# Supplementary material for: SERS-based detection of 5-S-cysteinyl-dopamine as a novel biomarker of Parkinson's disease in artificial biofluids
Source: Royal Society of Chemistry journal article supplement (doi:10.1039/d3an00027c), 2023-01-01
Supplement: d3an00027c1.pdf [file d3an00027c1.pdf]

## **SERS-based detection of 5-S-cysteinyl-dopamine as a novel biomarker of Parkinson's Disease in artificial biofluids**

Isidro Badillo-Ramírez<sup>a\*</sup>, Bruno Landeros-Rivera<sup>b</sup>, José M. Saniger<sup>c</sup>, Jürgen Popp<sup>d,e</sup> and Dana Cialla-May<sup>d,e</sup>

<sup>a</sup> Center for Intelligent Drug Delivery and Sensing Using Microcontainers and Nanomechanics (IDUN), Department of Health Technology, Technical University of Denmark, Kongens Lyngby 2800, Denmark

<sup>b</sup> Facultad de Química, Departamento de Física y Química Teórica, Universidad Nacional Autónoma de México, Circuito exterior S/N, Ciudad Universitaria, 04510, Ciudad de México, Mexico.

<sup>c</sup> Instituto de Ciencias Aplicadas y Tecnología, Universidad Nacional Autónoma de México, Circuito exterior S/N, Ciudad Universitaria, 04510, Ciudad de México, Mexico.

<sup>d</sup> Friedrich Schiller University Jena, Institute of Physical Chemistry and Abbe Center of Photonics, Helmholtzweg 4, 07743 Jena, Germany

<sup>e</sup> Leibniz Institute of Photonic Technology Jena, Member of the Leibniz Research Alliance – Leibniz Health Technologies, Albert-Einstein-Str. 9, 07745 Jena, Germany

\*Corresponding author: I-BR (ibara@dtu.dk)

**Supplementary Information**

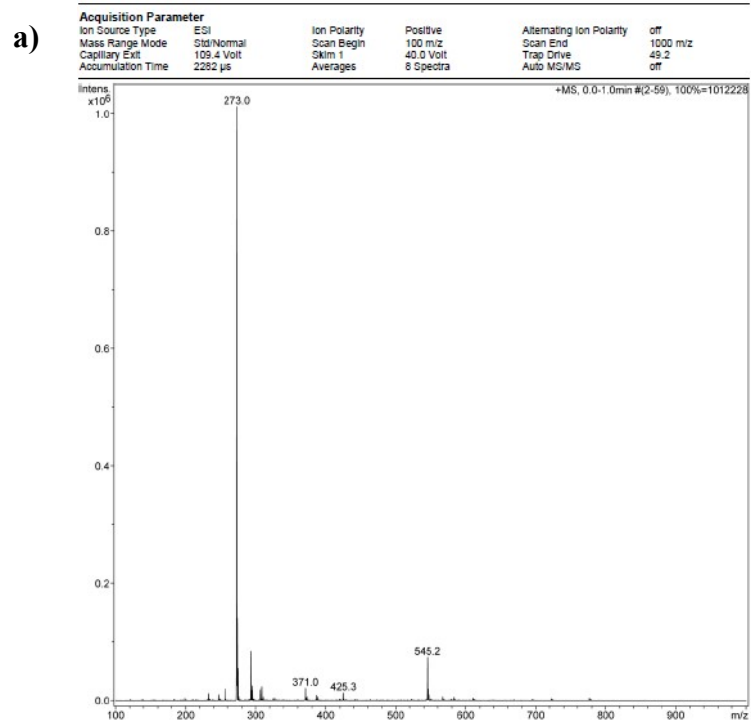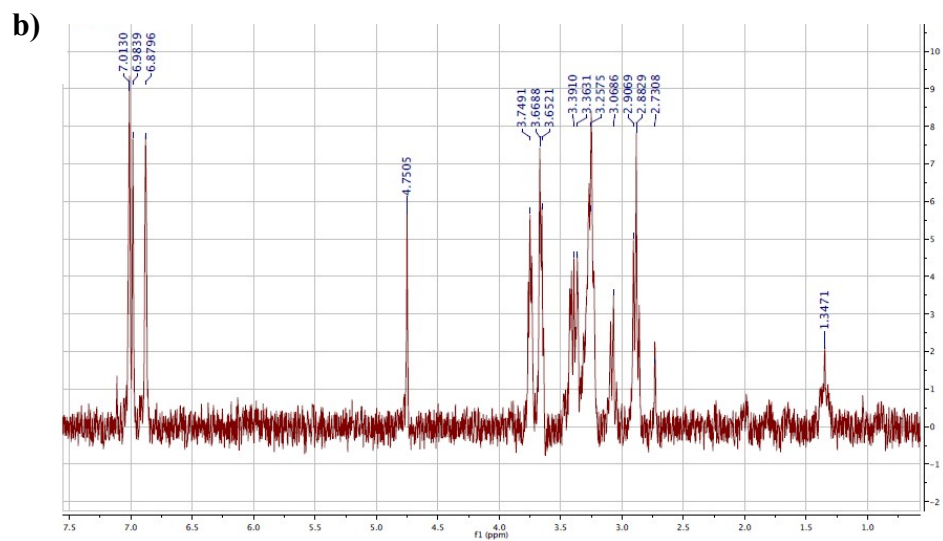

**Fig. S1.** Spectroscopic characterization of CDA after purification. a) Electrospray ionization mass spectrometry (ESI-MS) analysis; main abundance peak is at 273.0. b) Proton nuclear magnetic resonance (Bruker Avance 300 MHz) of CDA, molecular coupling (chemical shifts) correlated to the reported molecular structure of CDA.

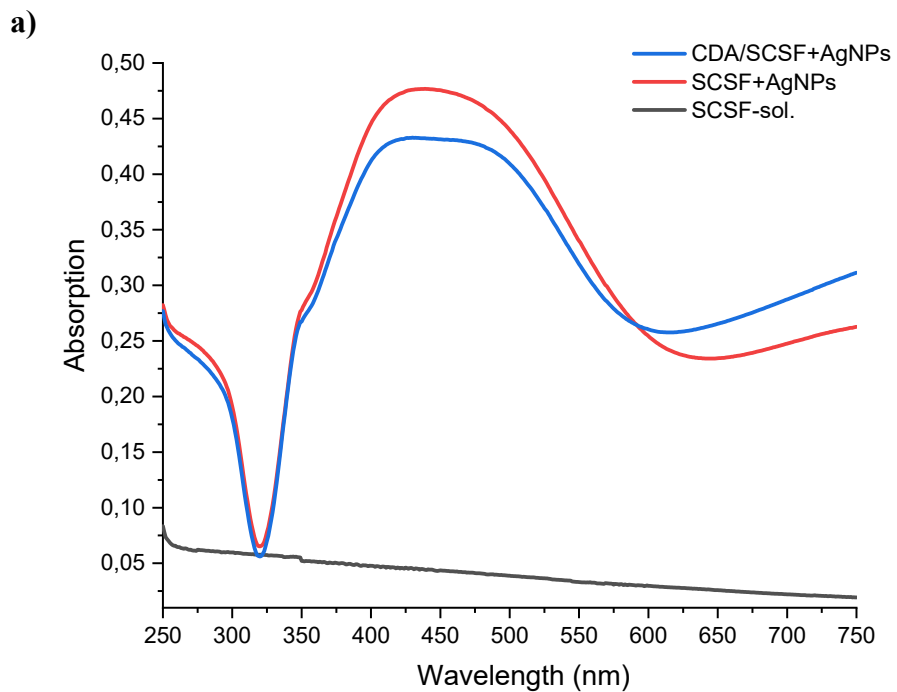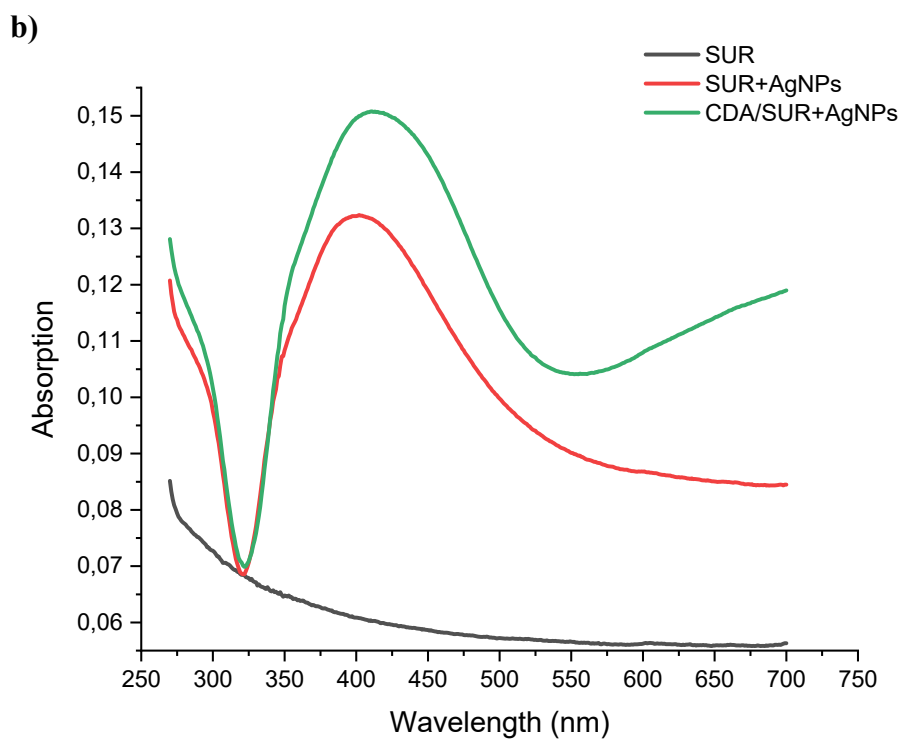

**Fig. S2.** UV-vis absorption bands of reference solutions of simulated biological fluids and their mixture with colloid nanoparticles: a) SCSF and b) SUR.

**Table S1.** Calculated Raman, calculated SERS and experimental SERS band assignments of CDA in different media.

| Tentative band assignment                                                | Calculated Raman (cm <sup>-1</sup> ) | Calculated SERS (cm <sup>-1</sup> ) | SERS CDA/H <sub>2</sub> O (cm <sup>-1</sup> ) | SERS CDA/SCSF (cm <sup>-1</sup> ) | SERS CDA/SUR (cm <sup>-1</sup> ) |
|--------------------------------------------------------------------------|--------------------------------------|-------------------------------------|-----------------------------------------------|-----------------------------------|----------------------------------|
| NH <sub>2</sub> , NH <sub>3</sub> <sup>+</sup> def.                      | 1656                                 | 1642                                | 1654                                          | 1650                              |                                  |
| C=C ring str./ NH <sub>2</sub> sci./NH <sub>2</sub> def.                 | 1629                                 | 1606                                | 1616                                          | 1616                              |                                  |
| Arom. ring str./ OH def. (catechol)                                      |                                      |                                     | 1577                                          | 1577                              | 1565                             |
| C-C (arom.)/ C-O-H in-plane bend.                                        |                                      |                                     | 1546                                          | 1542                              |                                  |
| C-C ring str./ OH def. (catechol)                                        | 1512                                 | 1498                                | 1498                                          | 1507                              | 1504                             |
| Ring def./ C-O-H in-plane def./N-C-H def.                                | 1485                                 | 1435                                | 1445                                          | 1445                              | 1440                             |
| C-C str. (arom.)/C-O-H in-plane bend./COO <sup>-</sup> asym str.         | 1386                                 | 1417/1372                           | 1419                                          | 1419                              | 1416                             |
| CH wag./NH twi./ COO <sup>-</sup> str./ COH bend.                        | 1323                                 | 1327                                | 1330                                          | 1330                              | 1339                             |
| Ring breathing/CH in-plane rock. (arom.)/ CCH bend.                      | 1305                                 | 1309/1282                           | 1267                                          | 1271                              | 1270                             |
| CH <sub>2</sub> in-plane bend./ NH <sub>2</sub> twist.                   | 1251                                 | 1255                                | 1226                                          | 1230                              | 1228                             |
| CH <sub>2</sub> in-plane bend./C-O-H bend. (catechol)/ CO str.           | 1212                                 | 1201                                | 1199                                          | 1199                              |                                  |
| C-N str. / S-C-C-N twist./ C-O str.                                      | 1152                                 | 1165                                | 1139                                          | 1144                              | 1143                             |
| S-C-C-N tor./ NH <sub>2</sub> bend.                                      |                                      | 1084                                |                                               |                                   |                                  |
| C-S-C in-plane bend. (arom.)/ C-S-C-N def. (arom.)                       | 1026                                 |                                     |                                               |                                   |                                  |
| Urea                                                                     |                                      |                                     |                                               |                                   | 1002                             |
| C-N str C-C def. (arom.)/ N-C-H and H-C-H def./ C-OH def. (catecol)      |                                      |                                     | 996                                           | 996                               | 928                              |
| CH in-plane bend./NH <sub>2</sub> wag./ skeletal C-C str.                | 891                                  | 895                                 |                                               | 898                               |                                  |
| O-H out-of-plane def.                                                    |                                      | 868                                 | 870                                           | 874                               |                                  |
| CH wag. (arom.)/OH rock./ H-N-C in-plane def.                            | 837                                  | 832                                 | 813                                           |                                   | 818                              |
| COO <sup>-</sup> bend./NH <sub>2</sub> wag./C-C-S def.                   | 801/738                              |                                     | 789                                           | 789                               | 768                              |
| C-S str. /Ring breath due to S/ C-COO <sup>-</sup> def.                  | 693                                  | 706                                 | 664                                           | 664                               | 660                              |
| S-C ring out-of plane def./ C-S str. /COO <sup>-</sup> out-of plane def. | 639                                  | 634/616                             | 616                                           | 611                               | 612                              |
| C-S-C def./ring out-plane def./ NH <sub>3</sub> <sup>+</sup> rock.       | 585                                  | 562                                 | 562                                           | 562                               | 570                              |
| CCN def./COOH def./ C-S def.                                             |                                      |                                     |                                               |                                   | 469                              |
| Arom. Ring out-of plane def.                                             | 414                                  | 436                                 | 414                                           | 414                               | 410                              |

**Abbreviations:** arom. (aromatic); asym. (asymmetric); bend. (bending); def. (deformation); vibr. (vibration); sym. (symmetric); str. (stretching); twist. (twisting); tors. (torsion); twist. (twisting); wag. (wagging).

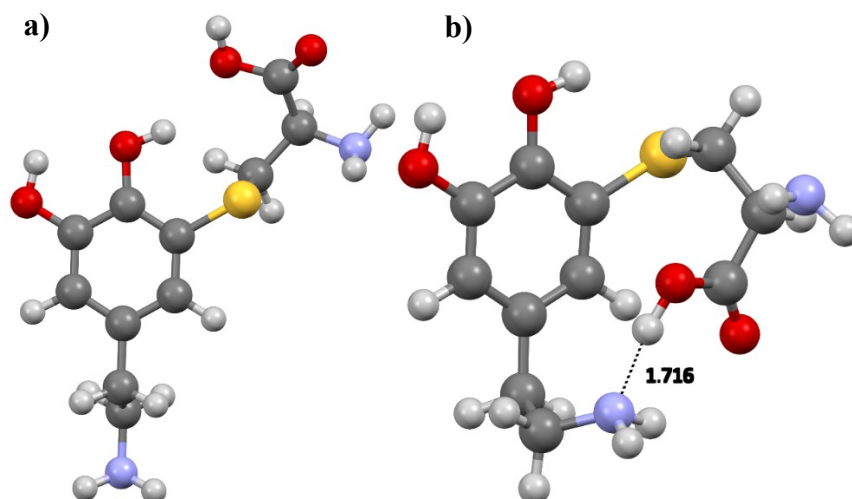

**Fig. S3.** Calculated CDA molecular configurations: a) open and b) closed. The intramolecular hydrogen bond distance in the closed configuration is 1.716 Å.

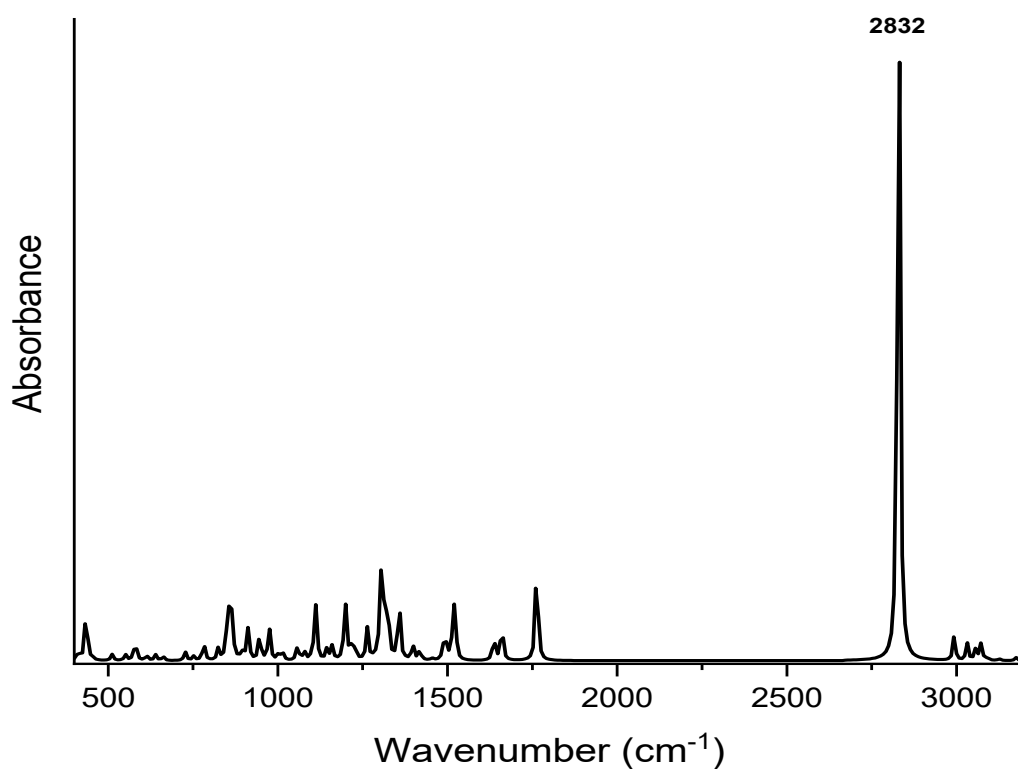

**Fig. S4.** Calculated FTIR spectrum of CDA on its closed conformation.

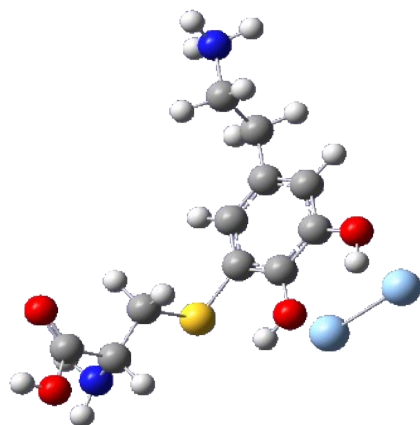

**Fig S5.-** Simulated CDA open configuration with catechol orientation towards the Ag dimeric atoms.

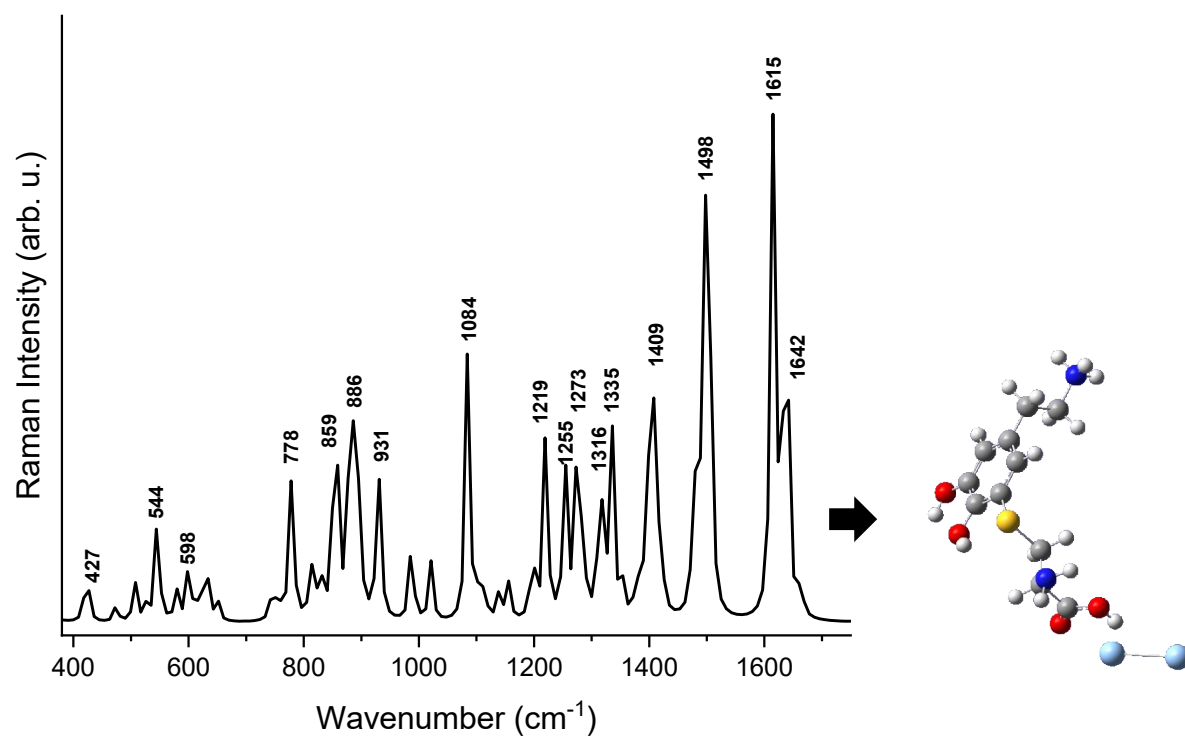

**Fig S6.-** Calculated SERS spectra of CDA on its open configuration with carboxylic acid orientation towards the Ag dimeric atoms.

**Table S2.** Values for the electron density ( $\rho_B$ ), laplacian ( $\nabla\rho_B^2$ ) and electron energy density ( $H_B$ ) at the bond critical points, in atomic units. The corresponding delocalization indexes (DI) and the classification for each type of interaction are also shown.

| Interaction        | $\rho_B$ | $\nabla\rho_B^2$ | $H_B$     | DI          | Classification |
|--------------------|----------|------------------|-----------|-------------|----------------|
| <b>Complex I</b>   |          |                  |           |             |                |
| H...Ag             | 0.014508 | 0.037751         | 0.000494  | 0.08        | vdW            |
| H...Ag             | 0.002838 | 0.005871         | 0.000237  | 0.02        | vdW            |
| O→Ag               | 0.029478 | 0.116765         | -0.001645 | <b>0.26</b> | Dative         |
| <b>Complex II</b>  |          |                  |           |             |                |
| H...Ag             | 0.005036 | 0.011180         | 0.000404  | 0.03        | vdW            |
| H...Ag             | 0.016298 | 0.044375         | 0.000662  | 0.08        | vdW            |
| O→Ag               | 0.051381 | 0.246234         | -0.003937 | <b>0.35</b> | Dative         |
| <b>Complex III</b> |          |                  |           |             |                |
| H...Ag             | 0.020080 | 0.046166         | -0.000297 | 0.08        | Strong vdW     |
| O...Ag             | 0.010264 | 0.033325         | 0.000964  | 0.07        | vdW            |
| S→Ag               | 0.056663 | 0.145587         | -0.011001 | <b>0.53</b> | Dative         |
